# Supplementary material for: Multifactorial optimization of endothelial cell growth using modular synthetic extracellular matrices
Source: Royal Society of Chemistry journal article supplement (doi:10.1039/c0ib00112k), 2011-01-01
Supplement: c0ib00112k.pdf [file c0ib00112k.pdf]

## Supporting Information

### *Multifactorial optimization of endothelial cell growth using modular synthetic extracellular matrices*

Jangwook P. Jung, José V. Moyano, and Joel H. Collier

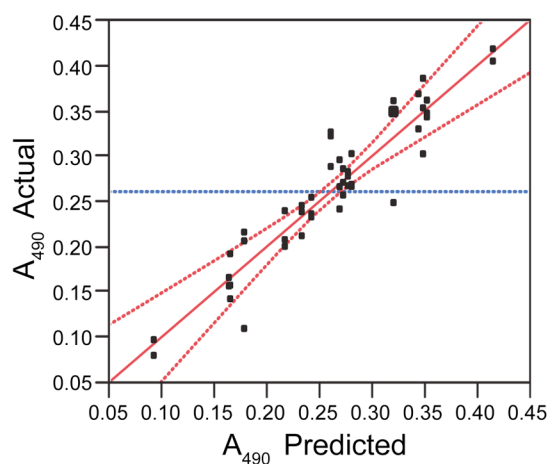

**Figure S1.** Actual by Predicted plot of the FEs (dotted red line, confidence interval; dotted blue line, mean of response); fit includes all interaction terms.

**Table S1.** Summary of the FEs

#### Summary of Fit

|                        |          |
|------------------------|----------|
| R <sup>2</sup>         | 0.90407  |
| Root Mean Square Error | 0.031261 |
| Mean of Response       | 0.260553 |
| Observations           | 51       |

#### Analysis of Variance

|          |         |
|----------|---------|
| F ratio  | 21.9900 |
| Prob > F | <0.0001 |

#### Lack of Fit

|          |         |
|----------|---------|
| F ratio  | 10.1565 |
| Prob > F | 0.0031  |

Observations, the number of observations used in the fit; F-ratio, testing the hypothesis that all parameters are zero; Prob > F, the probability of obtaining a greater F-value by chance alone if the specified model fits no better than the overall response mean.
